# Supplementary material for: Facile synthesis of polypyrrole@metal–organic framework core–shell nanocomposites for dual-mode imaging and synergistic chemo-photothermal therapy of cancer cells
Source: Royal Society of Chemistry journal article supplement (doi:10.1039/c6tb03218d), 2017-01-01
Supplement: c6tb03218d1.pdf [file c6tb03218d1.pdf]

## Supporting Information

### **Facile synthesis of polypyrrole@metal-organic frameworks core-shell nanocomposites for dual-mode imaging and synergistic chemo-photothermal therapy of cancer cells**

Xiangjun Chen,<sup>a</sup> Manjie Zhang,<sup>a</sup> Shengnan Li,<sup>a</sup> Lu Li,<sup>a</sup> Lingyu Zhang,<sup>a</sup> Tingting Wang,<sup>\*b</sup> Min Yu,<sup>a</sup> Zhongcheng Mou,<sup>a</sup> and Chungang Wang<sup>\*a</sup>

<sup>a</sup> National & Local United Engineering Laboratory for Power Battery, Department of Chemistry, Northeast Normal University, Changchun, 130024, P. R. China

<sup>b</sup> School of Chemistry & Environmental Engineering, Changchun University of Science and Technology, Changchun, 130022, P. R. China

E-mail: wangcg925@nenu.edu.cn, wangtt@cust.edu.cn

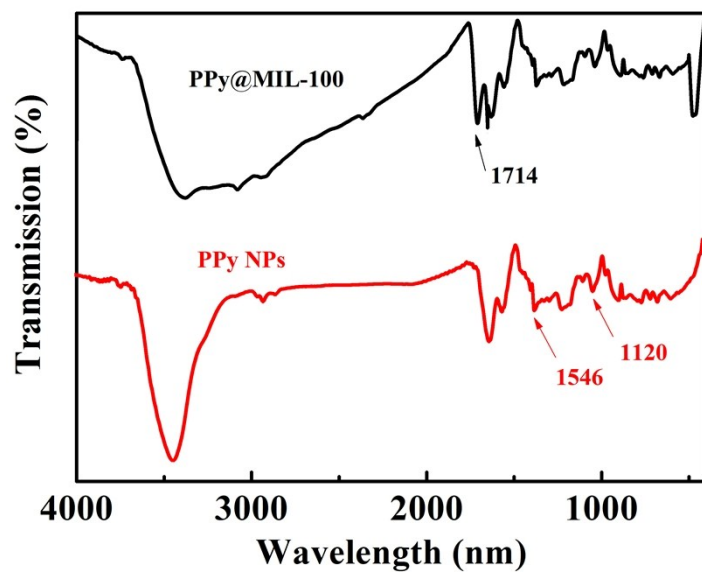

**Fig. S1** FTIR spectra of PPy@MIL-100(Fe) NCs and PPy NPs.

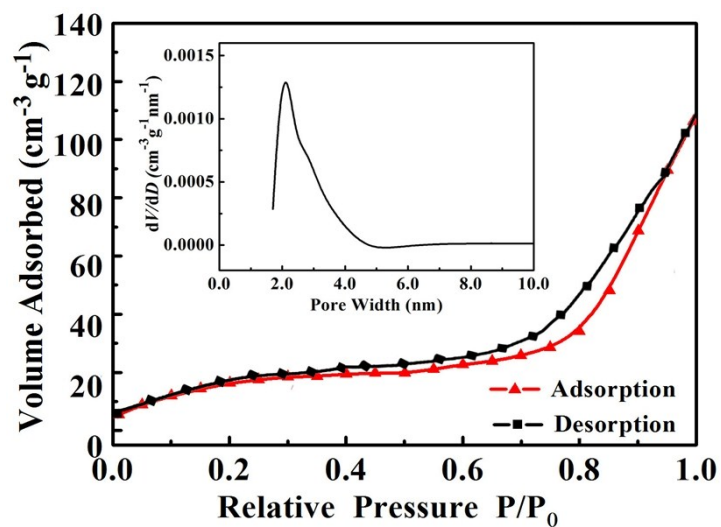

**Fig. S2** N<sub>2</sub> adsorption-desorption isotherm and pore size distribution of PPy@MIL-100(Fe) NCs.

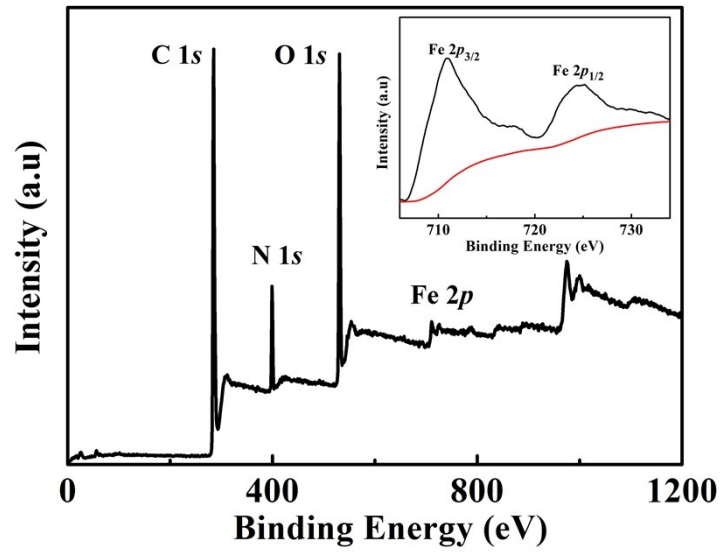

**Fig. S3** XPS analysis of PPy@MIL-100(Fe) NCs .

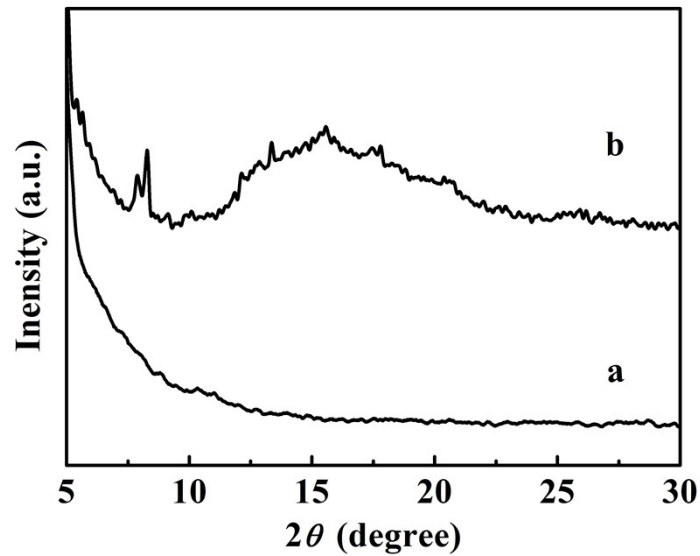

**Fig. S4** XRD patterns (a) PPy NPs and (b) PPy@MIL-100(Fe) NCs.

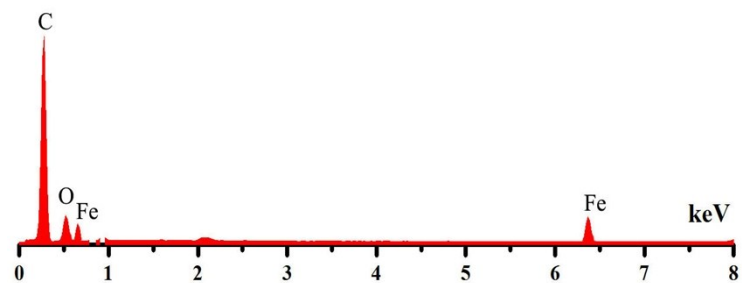

**Fig. S5** EDX analysis of PPy@MIL-100(Fe) NCs.

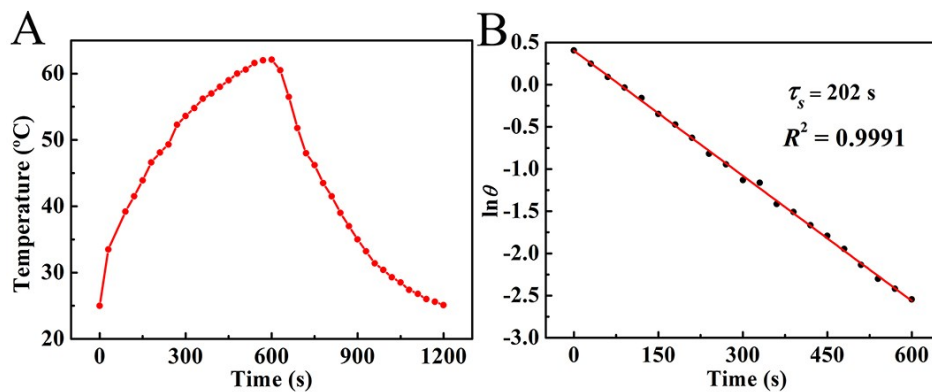

**Fig. S6** (A) Photothermal effect of the irradiation of the aqueous dispersion of PPy@MIL-100(Fe) NCs with the NIR laser (808 nm, 2 W cm<sup>-2</sup>), in which the irradiation lasted for 5 min, and then the laser was turned off. (B) Time constant for heat transfer from the system is determined to be  $\tau_s = 202$  s by applying the linear time data from the cooling period versus negative natural logarithm of driving force temperature.

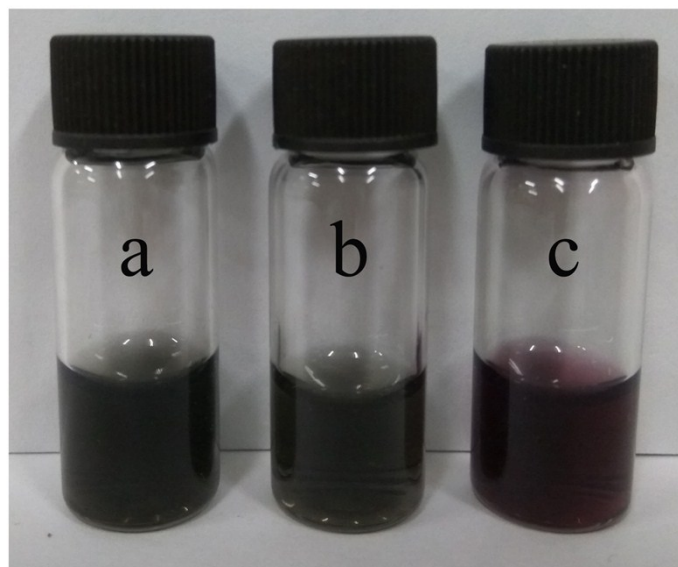

**Fig. S7** Photographs of PPy@MIL-100(Fe) NCs (a) water, (b) PBS buffer and (c) culture medium with serum and they were stored for 4 days, respectively.

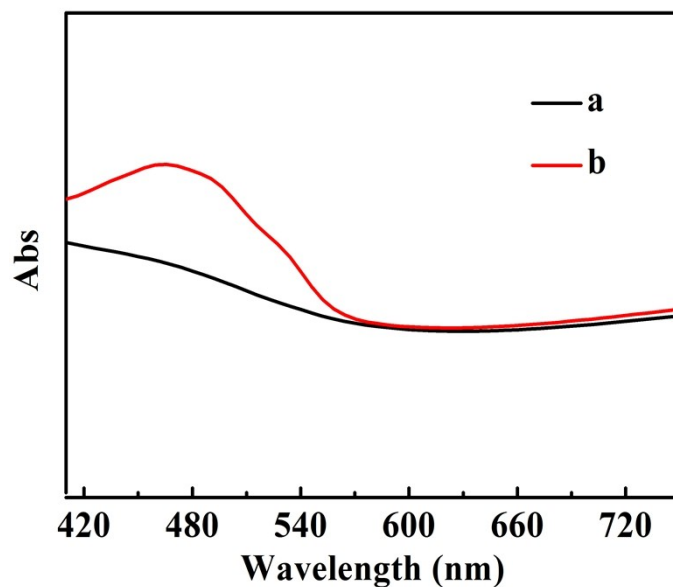

**Fig. S8** UV-Vis spectra of PPy@MIL-100(Fe) NCs (a) and DOX-loaded PPy@MIL-100(Fe) NCs (b)

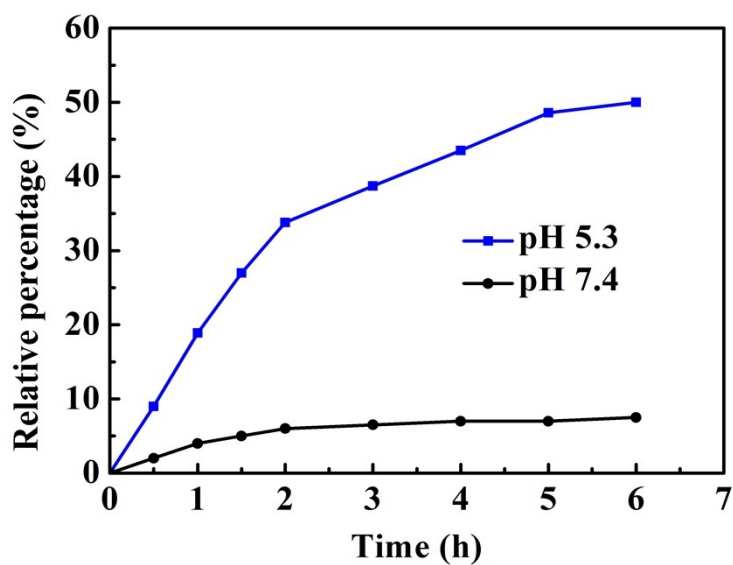

**Fig. S9** The Fe content profiles of PPy@MIL-100(Fe) NCs in the PBS (pH 5.3, pH 7.4) at different time points at 37 °C.

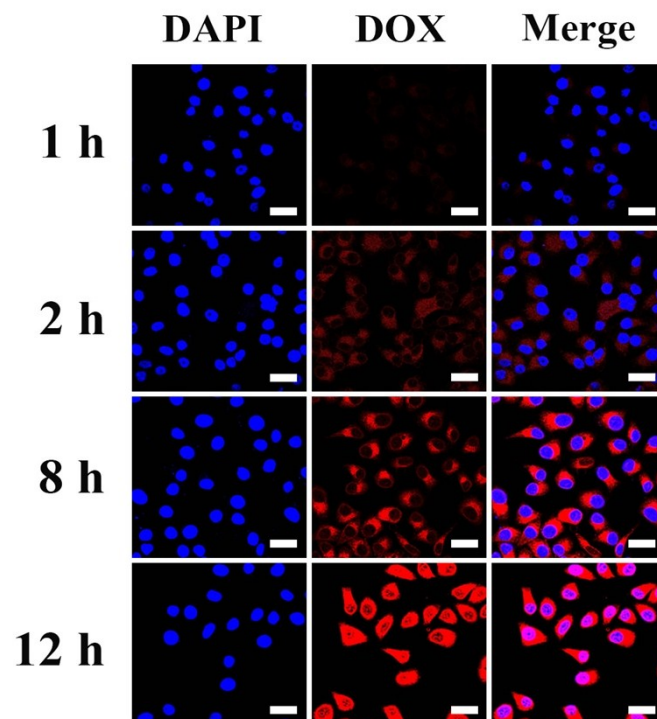

**Fig. S10** CLSM images of HepG-2 cells incubated with DOX-loaded PPy@MIL-100(Fe) NCs for 1, 2, 8, 12 h at 37 °C, respectively. Each series can be classified to cell nucleus (being dyed in blue by DAPI), DOX-loaded PPy@MIL-100(Fe) NCs and the merged images of both above, respectively. All scale bars are 20  $\mu\text{m}$ .
